# Supplementary material for: New layered organic-inorganic magnets incorporating azo dyes
Source: Royal Society of Chemistry journal article supplement (doi:10.1039/b905557f), 2009-01-01
Supplement: b905557f.pdf [file b905557f.pdf]

## Supplementary Information

### New layered organic-inorganic magnets incorporating azo dyes

*Émilie Delahaye, Séraphin Eyele-Mezui, Jean-François Bardeau, Cédric Leuvrey, Loïc Mager, Pierre Rabu, Guillaume Rogez*

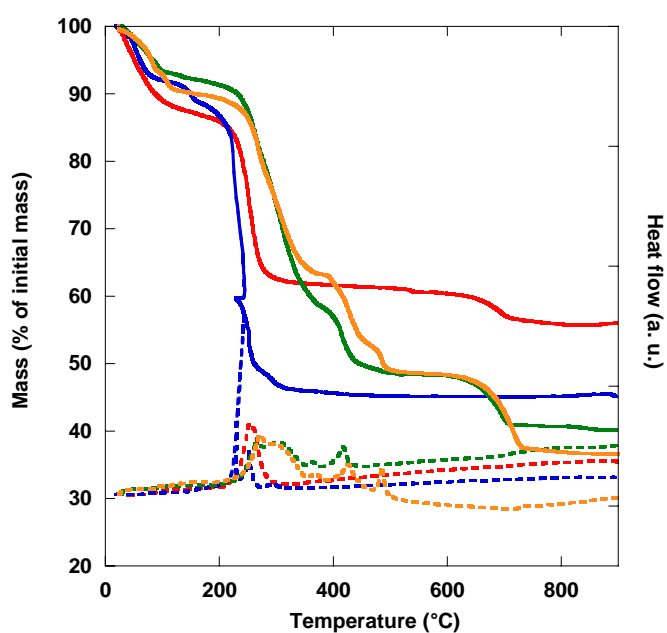

**Fig. S1** TGA (full lines) and TDA (dotted lines) curves for **MRcCo** (1) (blue), **MOcCo** (2) (orange), **OrangeIVcCo** (3) (green), and **MY10cCo** (4) (red).

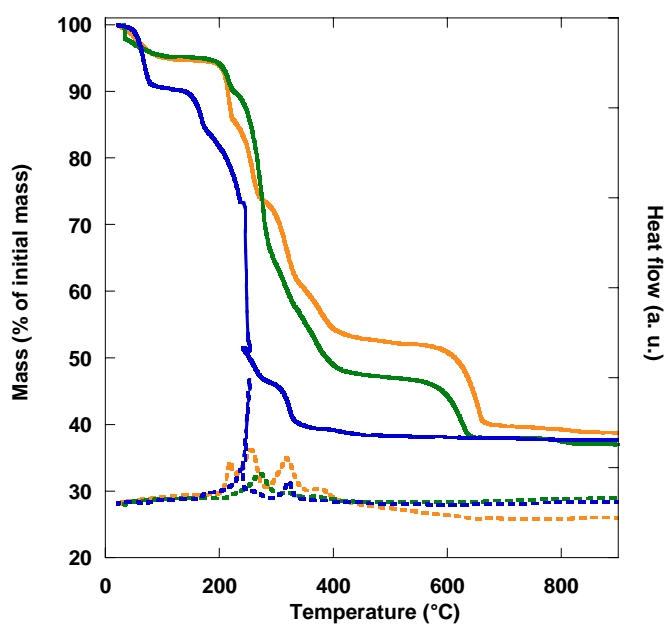

**Fig. S2** TGA (full lines) and TDA (dotted lines) curves for **MRcCu** (5) (blue), **MOcCu** (6) (orange), and **OrangeIVcCu** (7) (green).

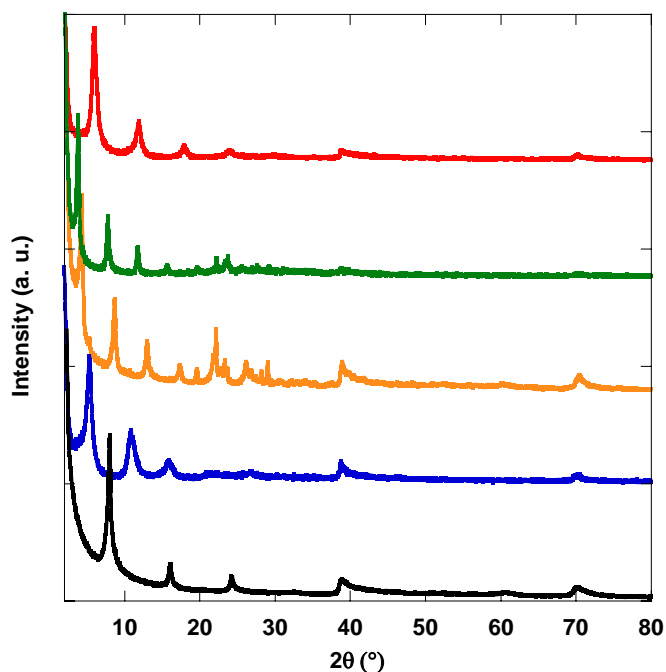

**Fig. S3** Powder XRD patterns of  $\text{Co}_2(\text{OH})_3(\text{OAc})\cdot\text{H}_2\text{O}$  (black), **MR-CO** (1) (blue), **MO-CO** (2) (orange), **OrangeIV-CO** (3) (green), and **MY10-CO** (4) (red) showing the shift of the  $00l$  diffraction lines ( $\text{Co K}\alpha_1 = 0.178897 \text{ nm}$ ).

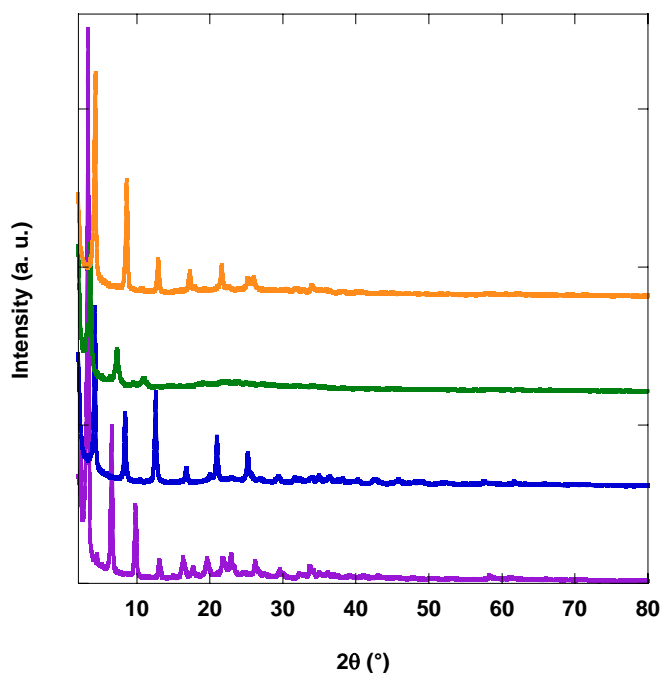

**Fig. S4** Powder XRD patterns of  $\text{Cu}_2(\text{OH})_3(\text{DS})$  (purple), **MR-CU** (5) (blue), **MO-CU** (6) (orange), and **OrangeIV-CU** (7) (green) showing the shift of the  $00l$  diffraction lines ( $\text{Cu K}\alpha_1 = 0.1540598 \text{ nm}$ ).

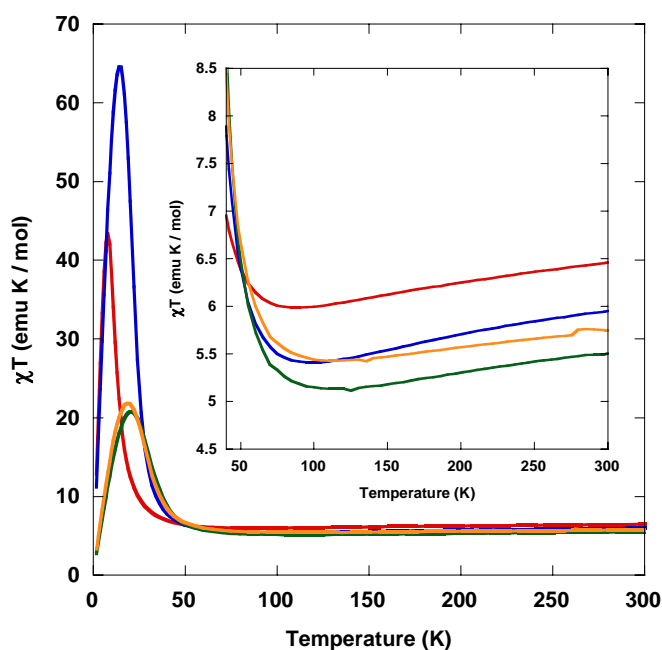

**Fig. S6** Magnetic behaviour as  $\chi T$  vs  $T$  plots of compounds **MRcCo** (1) (blue), **MOcCo** (2) (orange), **OrangeIVcCo** (3) (green), and **MY10cCo** (4) (red).

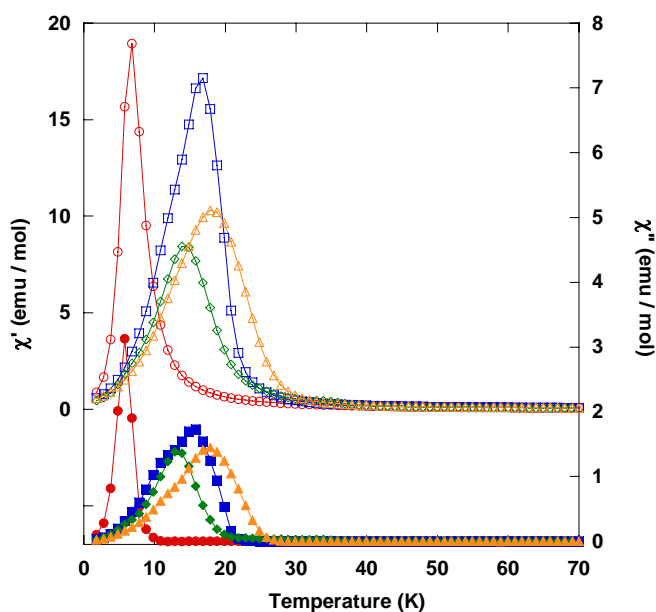

**Fig. S7** In phase ( $\chi'$ ) and out of phase ( $\chi''$ ) magnetic susceptibilities measured in an ac field of 0.35 mT at 100 Hz for **MRcCo** (1) (open and closed blue squares), **MOcCo** (2) (open and closed orange triangles), **OrangeIVcCo** (3) (open and closed green lozenges), and **MY10cCo** (4) (open and closed red circles) (full lines are just a guide for the eye).

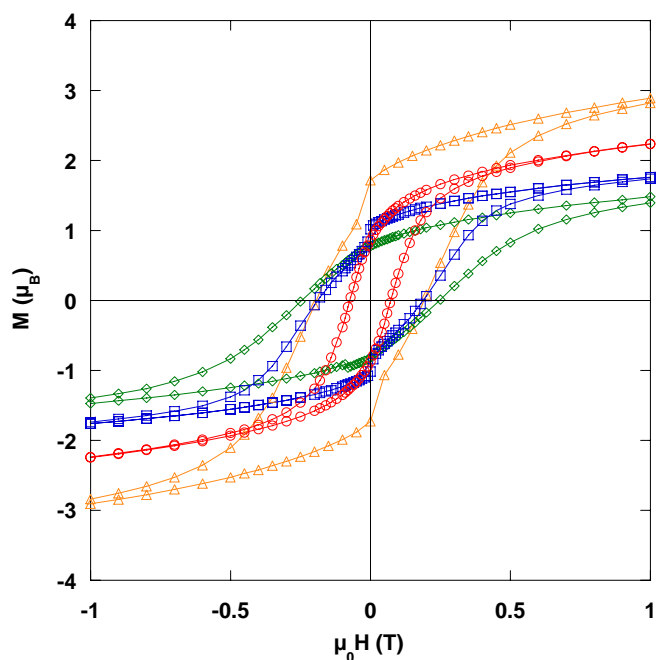

**Fig. S8** Field dependence at  $T = 1.8$  K of the magnetization of compounds **MRCo** (1) (open blue squares), **MOCo** (2) (open orange triangles), **OrangeIVCo** (3) (open green lozenges), and **MY10Co** (4) (open red circles) (full lines are just a guide for the eye).

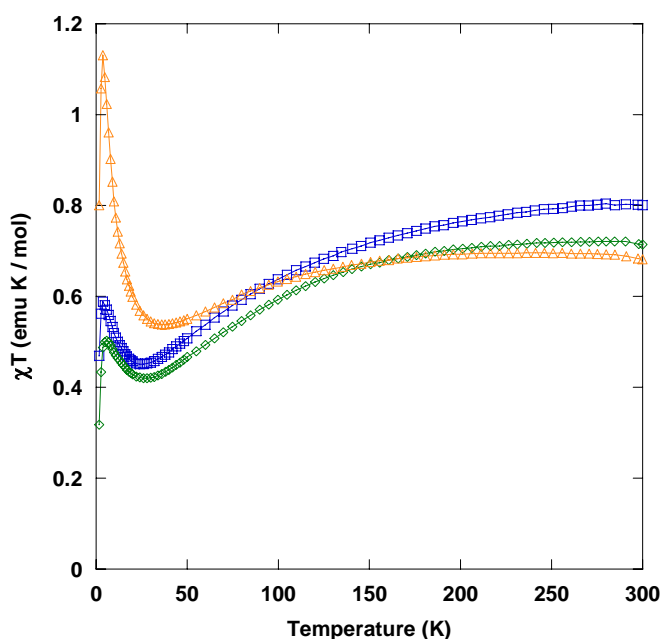

**Fig. S9** Magnetic behaviour as  $\chi T$  vs  $T$  plots of compounds **MRCo** (5) (open blue squares), **MOCo** (6) (open orange triangles), **OrangeIVCo** (7) (open green lozenges) (full lines are just a guide for the eye).

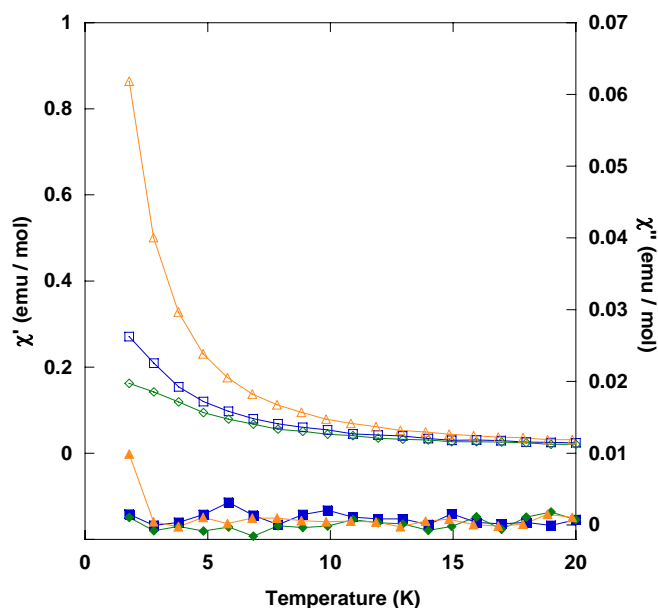

**Fig. S10** Field dependence at  $T = 1.8$  K of the magnetization of compounds **MR-Cu** (**5**) (open blue squares), **MO-Cu** (**6**) (open orange triangles), **OrangeIV-Cu** (**7**) (open green lozenges) (full lines are just a guide for the eye).

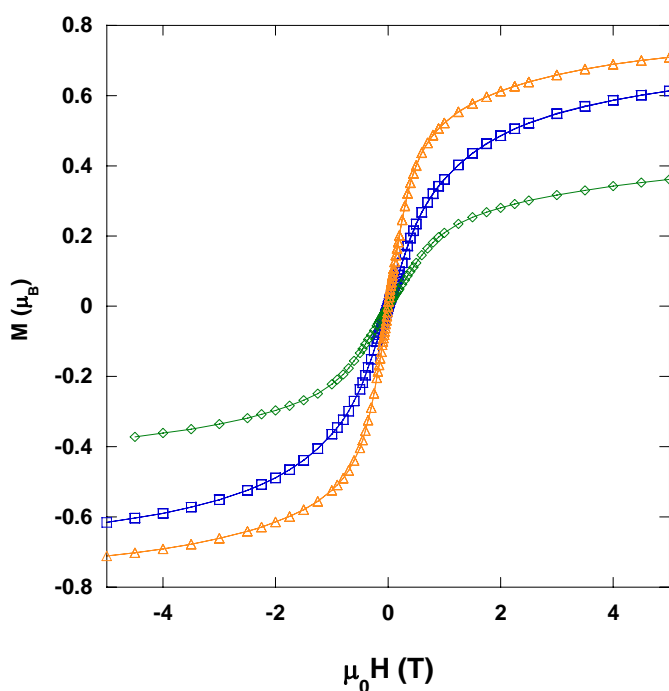

**Fig. S11** In phase ( $\chi'$ ) and out of phase ( $\chi''$ ) magnetic susceptibilities measured in an ac field of 0.35 mT at 100 Hz for **MR-Cu** (**5**) (open and closed blue squares), **MO-Cu** (**6**) (open and closed orange triangles), **OrangeIV-Cu** (**7**) (open and closed green lozenges) (full lines are just a guide for the eye).

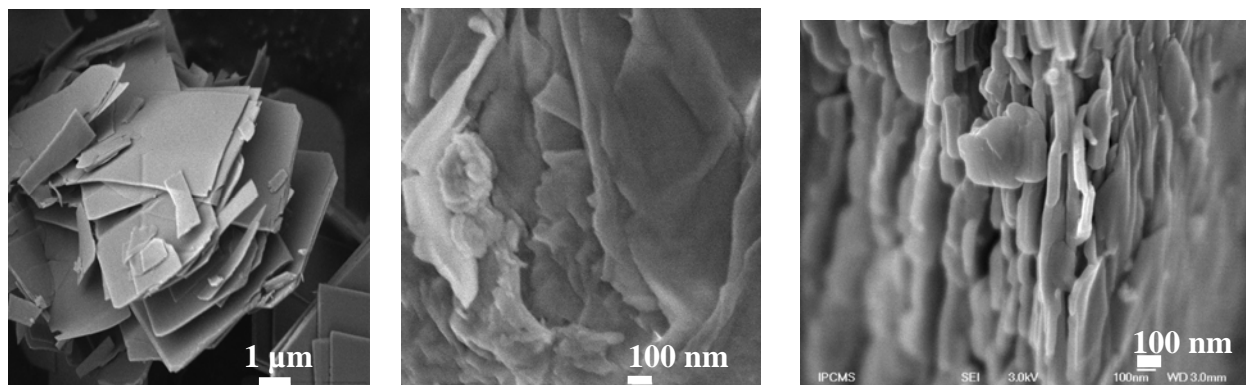

**Fig. S12** SEM images of the starting compounds  $\text{Cu}_2(\text{OH})_3(\text{Ac})\cdot\text{H}_2\text{O}$  (left),  $\text{Co}_2(\text{OH})_3(\text{OAc})\cdot\text{H}_2\text{O}$  (middle), and  $\text{Cu}_2(\text{OH})_3(\text{DS})$  (right).

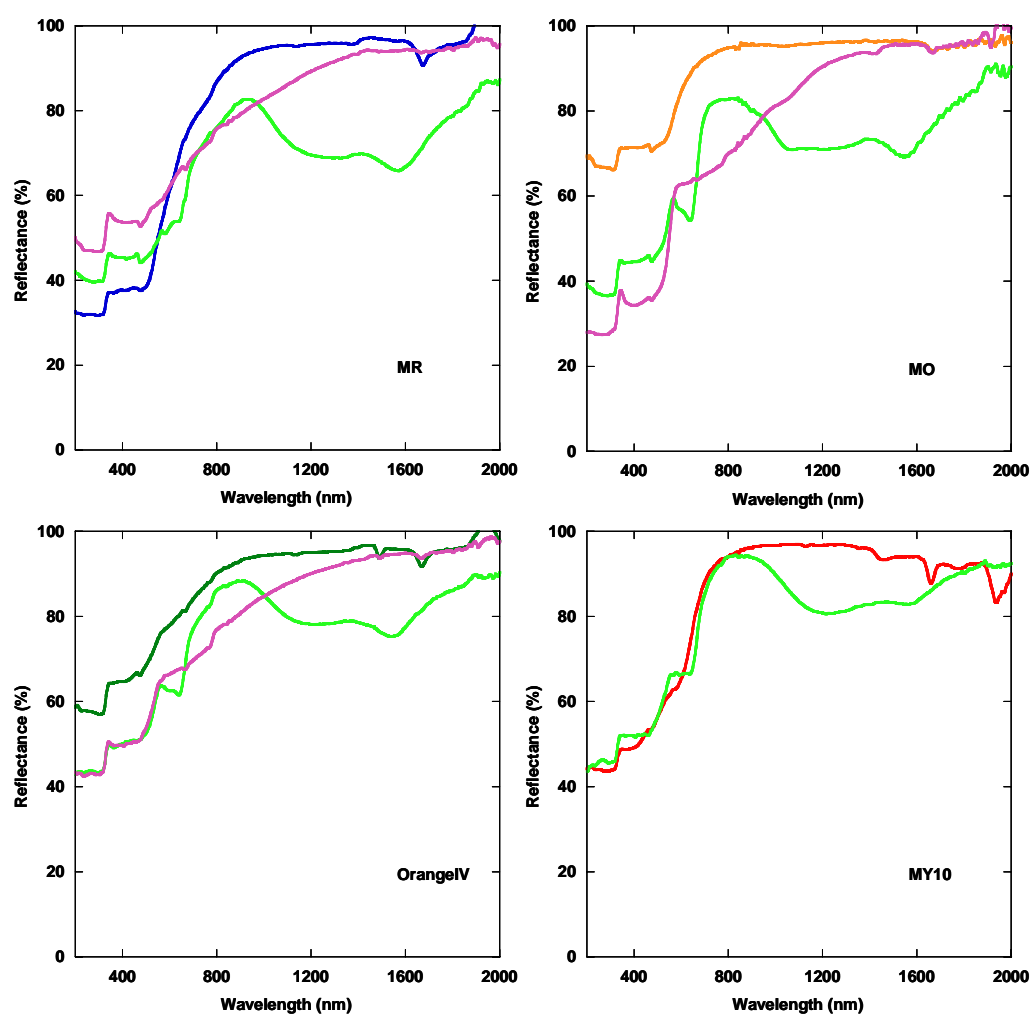

**Fig. S13** UV-Vis. reflectance spectra of hybrid compounds containing Co (bright green) and Cu (purple), compared to the starting dyes **MR** (blue), **MO** (orange), **OrangeIV** (green), and **MY10** (red).

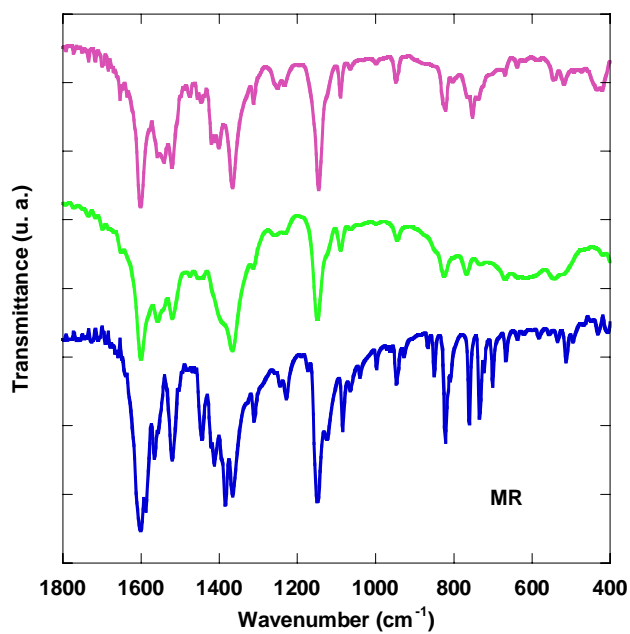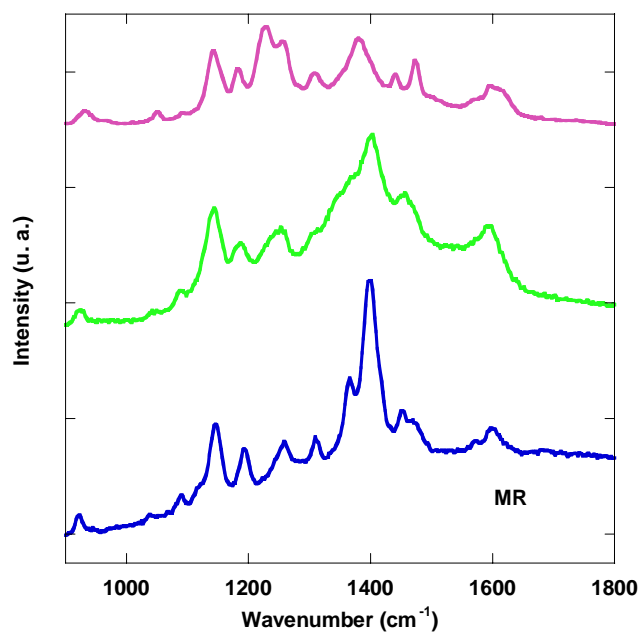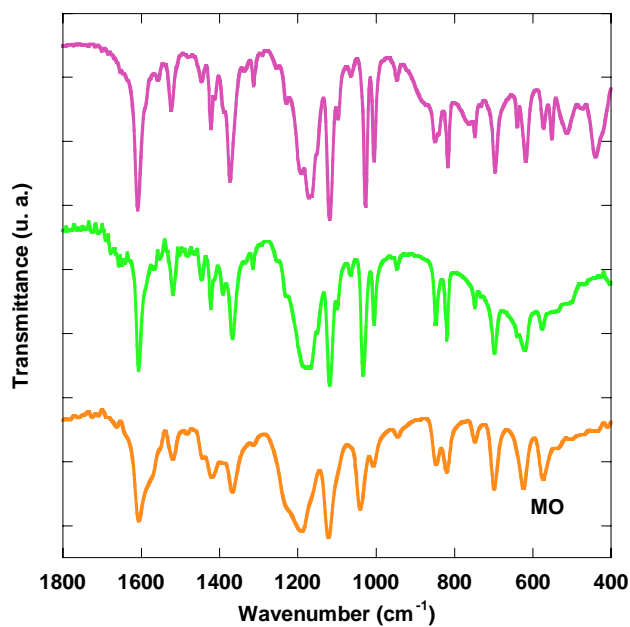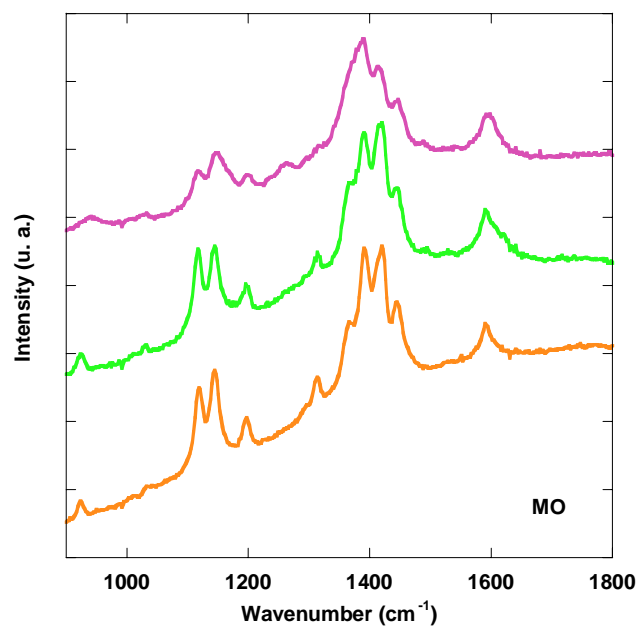

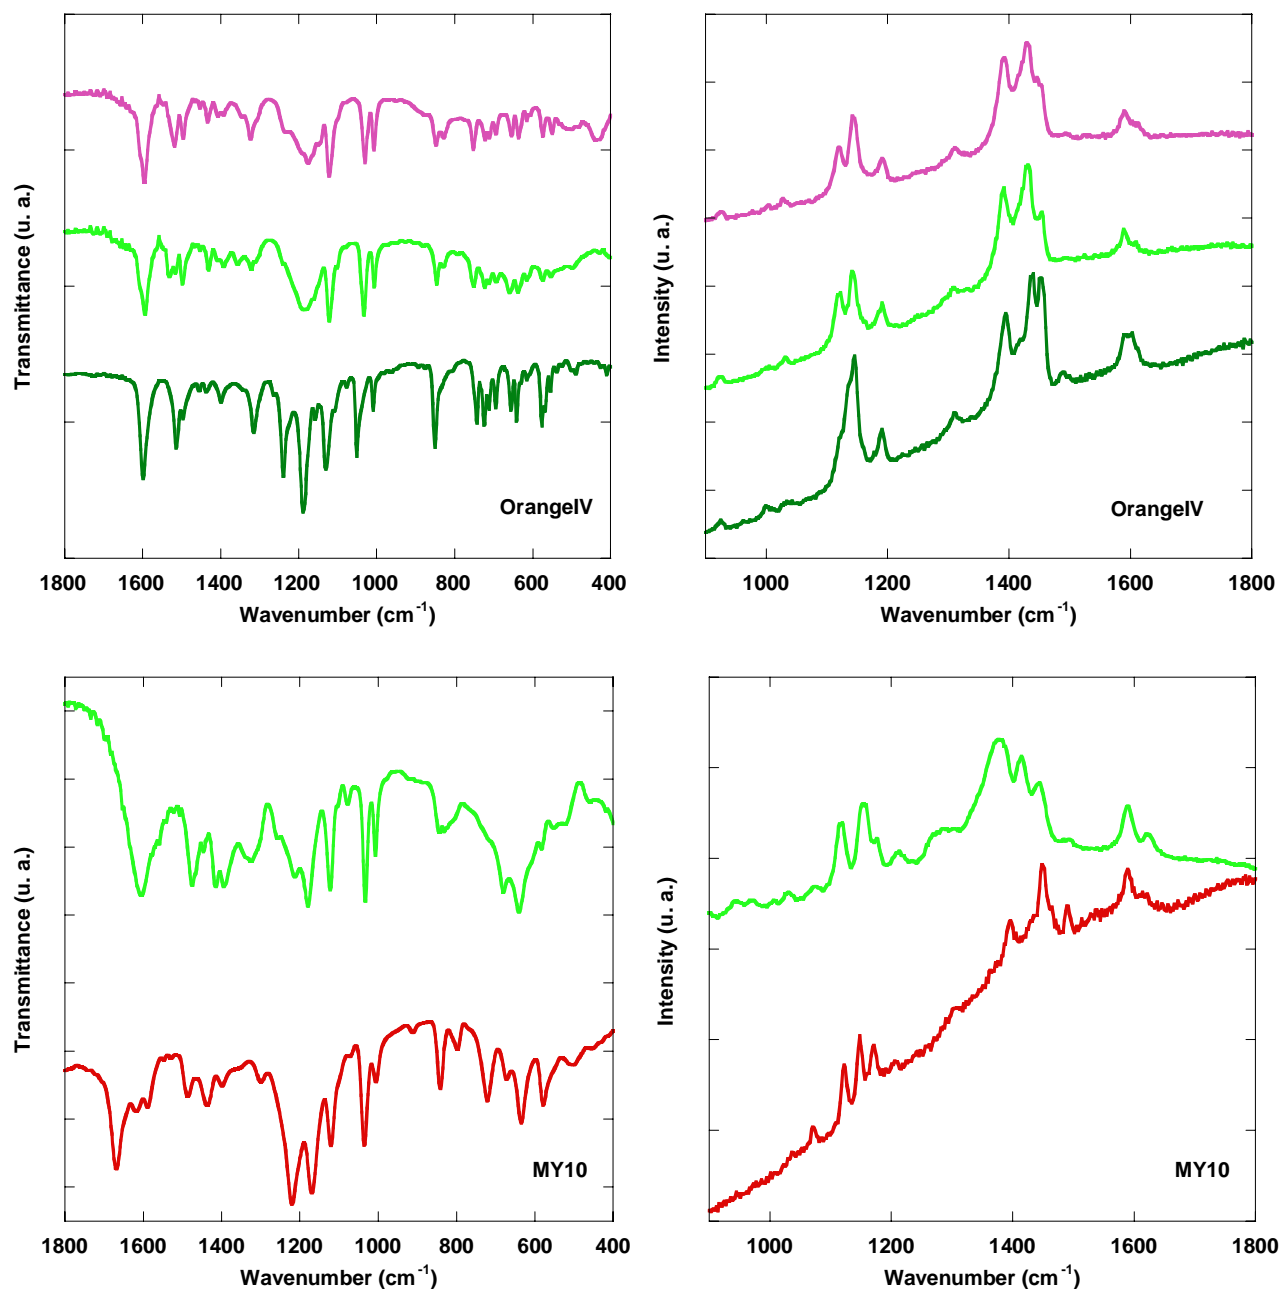

**Fig. S14** IR (left) and Raman (right) ( $\lambda_{\text{exc}} = 514.5 \text{ nm}$ ) spectra of the hybrid compounds containing Co (bright green) and Cu (purple), compared to the starting dyes **MR** (blue), **MO** (orange), **OrangeIV** (green), and **MY10** (red) (from top to bottom).
